# Supplementary material
Source: PubMed Central journal article supplement (PMC3420184)
Supplement: 1210585109_pnas.201210585SI.pdf [file 1210585109_pnas.201210585SI.pdf]

# Supporting Information

Park et al. 10.1073/pnas.1210585109

## SI Results

We identified 32 regions under selection using the cross-population extended haplotype homozygosity (XP-EHH) test and identified top candidate mutations within each region associated with drug resistance using the efficient mixed-model association (EMMA) test (Dataset S1). Of the 163 mutations, 48 (29%) were intergenic; 6 (4%) were intronic; 33 (20%) conferred synonymous changes; and 76 (47%) conferred nonsynonymous changes. We evaluated the annotations for the 59 genes on this list using gene and protein prediction algorithms through [PlasmoDB.org](http://PlasmoDB.org) (1) and associated links, including predicted Gene Ontology function, pathway, interpro domains, or user comments, combined with any published literature for each gene. The great majority of the 59 genes (65%) can be collectively classified into the following categories: surface molecules or transporters (11/59 or 19%, of which 6/59 or 10% are transporters) including *pfcr*; molecules involved in genome maintenance or transcriptional regulation (9/59 or 15%); metabolic enzymes (12/59 or 20%, of which 3/59 or 5% mediate lipid metabolism) including *dhfr*; and molecules involved in ubiquitination (6/59 or 10%). The remaining genes were determined as mediators of various other cellular functions including protein binding, invasion, and gamete fertilization (12/59 or 20%) or unclassified (9/59 or 15%).

We also analyzed all 35 genes within the chromosome 6 region (between position 1,117,269 and 1,390,662) found to be under selection in pyrimethamine-resistant parasites. This region contained a large stretch of intergenic mutations and it was difficult to localize the signal to any one gene. The region contains a large number of metabolic genes (12/35 or 34%, of which 3/35 or 9% participate in lipid metabolism; 2/35 or 6% mediate folate metabolism); chaperones and genes involved in ubiquitination (5/35 or 14%); with additional genes classified as genome maintenance or transcription regulation (8/35 or 23%); surface molecules or transporters (3/35 or 9%); other biological functions including structural proteins (2/35 or 6%); and the remainder (5/35 or 14%) as unclassified.

Molecules implicated in the ubiquitination cascade were mainly associated with resistance to pyrimethamine and include a putative E2 conjugating enzyme (PFL2100w), which likely acts as a ubiquitin E2 variant because of the lack of a catalytic cysteine and a HECT (homologous to the E6-AP carboxyl terminus) E3 ubiquitin ligase (MAL8P1.23). Within the chromosome 6 region there were several other molecules proposed to modulate ubiquitination including a HECT E3 (PFF1365c) and a Cullin-like E3 (PFF1445c). Two other molecules contain domains suggestive of a possible role in ubiquitination, including PF08\_0080, which contains a PUB (peptide:*N*-glycanase/UBA or UB $\bar{X}$ ) domain found in proteins linked to the ubiquitin proteasome system (2), and PFF1485w, which contains an ubiquitin-interacting motif. Also in this region are two putative chaperones, including a protein containing a Dna J domain (PFF1415c) associated with heat shock molecules (3) and a TRP (tetratricopeptide repeat protein) (PFF1505w) involved in RNA degradation (4), with a proposed chaperone function. Finally, there is a putative RING E3 (PFD0765w) in a region of selection associated with primaquine sensitivity.

Several genes putatively involved in lipid metabolism were identified in our regions of drug-associated selection, including an acyl-CoA synthetase, PfACS8 (PFB0695c) (5), and a putative phosphoanthonylcysteine synthetase (PFD0610w, under selection in quinine-resistant parasites) proposed to be involved in CoA biosynthesis. Other lipid-metabolism-associated molecules

in the chromosome 6 region include an acetyl-CoA synthetase (PFF1350c) (6), an ethanolaminephosphotransferase (PFF1375c-a/b) (7, 8), and a phosphatidylcholine-sterol acyltransferase precursor (PFF1420w). Finally, the PFD0350w gene, predicted to play a role in isoprenoid biosynthesis (9), is in a region under selection in artemisinin-sensitive parasites.

Folate pathway molecules in regions of selection specific to pyrimethamine-resistant parasites include the *dhfr* locus (PFD0830w), PF14\_0487 (aminomethyltransferase), as well as PFF1360w (6-pyruvolytetrahydropterin synthetase, and PFF1490w (methenyltetrahydrofolate activity) found within the chromosome 6 region. Folate metabolism has been shown to be a target of pyrimethamine resistance mechanisms and, specifically, SNP changes in *dhfr* and *dhps*, as well as copy number variants in *gchl* (10), are associated with antifolate resistance (11).

There are three ABC transporters among the gene lists, including PF10\_0049, MAL8P1.97, and PF08\_0078, which are intriguing because these molecules have been shown to modulate drug responses in malaria (e.g., *pfmdr1*) and other organisms (12). Finally, we believe that there are a large number of molecules from among the genome maintenance or transcriptional regulation classification may be candidates for drug modulation through changes in gene expression (13), chromatin or histone structure (14, 15), or RNA binding (16).

## SI Methods

**Drug Assays.** Drug assays were performed as previously described (17) with slight modifications for a 384-well format. Synchronized ring-stage parasites were cultured in the presence of serial dilutions of test compounds in 40  $\mu$ L of RPMI supplemented with AlbuMAX II (Life Technologies; 1021-045) at 1.0% (by volume) hematocrit and an initial parasitemia of 1.0% (by cell count) in black clear-bottom plates (Greiner Bio-one; 781090). Following a 72-h incubation under standard culture conditions, SYBR Green I dye (Invitrogen; S7563) was added to a dilution of 1:5,000 and plates were stored at room temperature until the fluorescence signal was read on a Spectramax M5 plate reader (Molecular Devices; ex 480 nm, em 530 nm). Raw fluorescence data were analyzed using the Prism v5.0 software package (GraphPad). After background subtraction and normalization, IC<sub>50</sub> values were determined based on application of a nonlinear regression log(inhibitor)-response curve fit.

**XP-EHH.** Selection-association tests were run using the XP-EHH test (18). Replicate IC<sub>50</sub> data were geometrically averaged [equivalently, log<sub>10</sub>(IC<sub>50</sub>) data were arithmetically averaged] and then converted to binary phenotypes (“sensitive” vs. “resistant”) according to cutoffs shown in Fig. S1. For drugs with a bimodal distribution, binary cutoffs were chosen at positions that clearly separated the sensitive and resistant populations. For drugs with a more unimodal distribution, cutoffs were manually placed at a distribution minimum near the median IC<sub>50</sub>, because the XP-EHH test, like many other tests, loses power when either of the two populations becomes too small (when the cutoff is too far from the median). Although these may not represent samples that are especially sensitive or resistant in the traditional sense, it is common in studies of quantitative phenotypes to simply compare the upper part of a distribution against the lower part for binary tests (19).

The recombination map was constructed with LDhat v2.1 (20) using a block penalty of 5.0, 10 million reversible-jump Markov chain Monte Carlo (rjMCMC) iterations, a missing data cutoff of



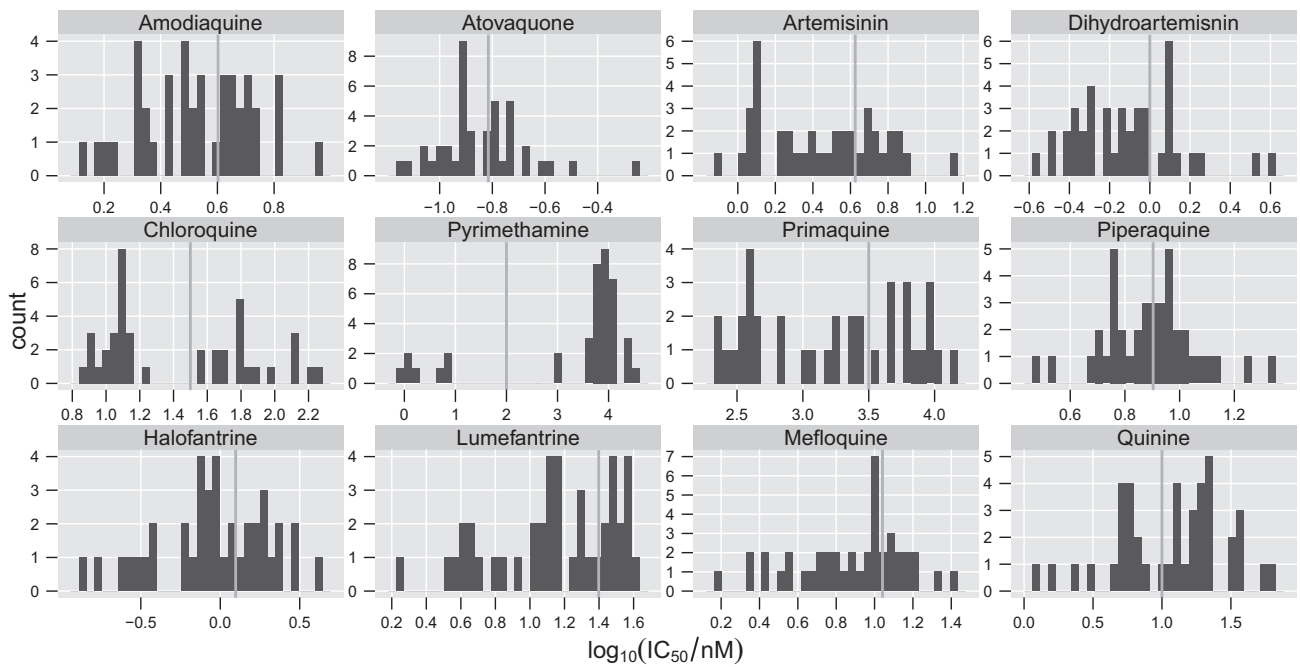

**Fig. S1.** Drug response distributions for the 12 drugs used in this study: histograms of  $\log_{10}(IC_{50})$  across 45 strains. Dark gray lines indicate binary cutoff values used for the XP-EHH test.

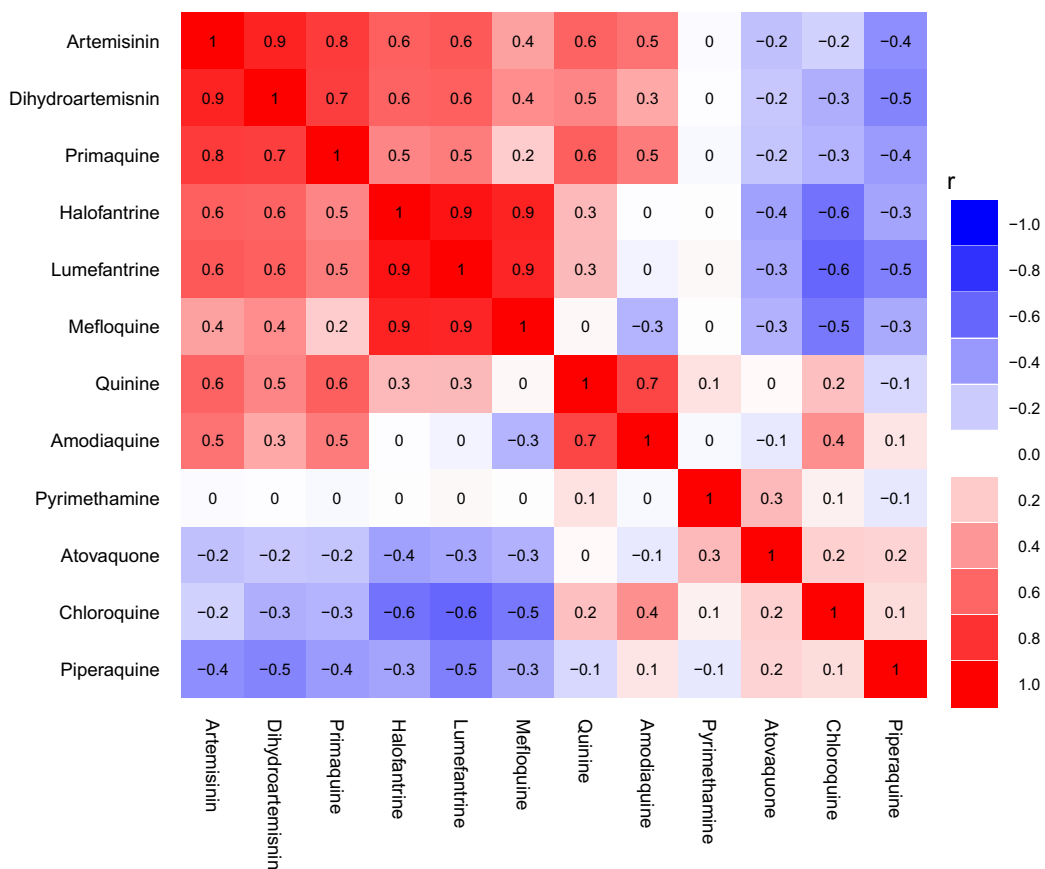

**Fig. S2.** Drug response correlation heat map for the 12 drugs used in this study. Pearson correlations are rendered for each pair of drugs, based on  $\log_{10}(IC_{50})$  values for each strain.
